# Supplementary material for: Road Traffic Noise at the Residence, Annoyance, and Cognitive Function in Elderly Women
Source: PubMed Central journal article supplement (PMC6572214; doi:10.3390/ijerph16101790), 2019-05-20
Supplement: ijerph-16-01790-s001.pdf [file ijerph-16-01790-s001.pdf]

## Supplementary Material

Throughout this Supplementary Material statistical significance ( $p < 0.05$ ) is indicated by boldface while borderline significance ( $0.05 < p < 0.1$ ) is indicated by italics.

**Table S1.** Description of the extended sample <sup>1</sup> ( $N = 747$ ).

| <b>Variable</b>                       | <b>Statistics</b> | <b>N</b> |
|---------------------------------------|-------------------|----------|
| Age (years), mean $\pm$ SD            | 73.4 $\pm$ 3.1    | 747      |
| Educational status (%) <sup>2</sup> : |                   |          |
| Low                                   | 16.9%             | 126      |
| Middle                                | 47.9%             | 358      |
| High                                  | 35.1%             | 262      |
| Missing                               | 0.1%              | 1        |
| Smoking (%)                           |                   |          |
| Yes                                   | 2.9%              | 22       |
| No                                    | 97.1%             | 725      |
| Missing                               | 0%                | 0        |
| Passive smoking at home (%)           |                   |          |
| Yes                                   | 60.0%             | 448      |
| No                                    | 39.4%             | 294      |
| Missing                               | 0.7%              | 5        |
| Physician-diagnosed depression (%)    |                   |          |
| Yes                                   | 11.0%             | 82       |
| No                                    | 88.6%             | 662      |
| Missing                               | 0.4%              | 3        |

<sup>1</sup> Study population with non-missing annoyance information and cognitive score (see Figure 1). <sup>2</sup> The highest educational status of the participant or her spouse.

**Table S2.** Adjusted associations of residential noise levels and annoyance with dichotomized cognitive scores <sup>1</sup> ( $N = 288$ ). Results are presented as odds ratios with 95% confidence intervals.

| Cognitive Score | Model                                            | Residential Noise           |                    | Noise Annoyance                         |                       |
|-----------------|--------------------------------------------------|-----------------------------|--------------------|-----------------------------------------|-----------------------|
|                 |                                                  | L <sub>DEN</sub>            | L <sub>NIGHT</sub> | Day                                     | Night                 |
| SeFl            | Main <sup>2</sup>                                | 1.28 (0.73, 2.22)           | 0.91 (0.55, 1.52)  | 0.95 (0.58, 1.54)                       | 1.04 (0.59, 1.85)     |
|                 | +noise <sup>3</sup>                              | 1.29 (0.73, 2.26)           | 0.91 (0.54, 1.54)  | 0.91 (0.56, 1.49)                       | 1.07 (0.59, 1.93)     |
|                 | +PM <sub>10</sub> , NO <sub>2</sub> <sup>4</sup> | 1.49 (0.82, 2.71)           | 1.01 (0.59, 1.74)  | 1.01 (0.61, 1.67)                       | 1.13 (0.62, 2.04)     |
|                 | +depression <sup>5</sup>                         | 1.28 (0.73, 2.22)           | 0.91 (0.55, 1.52)  | 0.95 (0.58, 1.54)                       | 1.04 (0.59, 1.86)     |
| BNT             | Main                                             | 1.45 (0.72, 2.93)           | 1.47 (0.82, 2.65)  | <b>0.52 (0.28, 0.95) *</b> <sup>6</sup> | 0.67 (0.33, 1.38)     |
|                 | +noise                                           | 1.56 (0.77, 3.20)           | 1.55 (0.85, 2.84)  | <b>0.48 (0.26, 0.88) *</b>              | 0.59 (0.28, 1.23)     |
|                 | +PM <sub>10</sub> , NO <sub>2</sub>              | 1.08 (0.51, 2.29)           | 1.16 (0.62, 2.17)  | <b>0.41 (0.21, 0.78) **</b>             | 0.53 (0.25, 1.14)     |
|                 | +depression                                      | 1.45 (0.72, 2.93)           | 1.46 (0.81, 2.64)  | <b>0.51 (0.28, 0.94) *</b>              | 0.66 (0.32, 1.35)     |
| PhFl            | Main                                             | 1.67 (0.89, 3.14)           | 1.26 (0.74, 2.17)  | 0.76 (0.45, 1.29)                       | 0.86 (0.45, 1.61)     |
|                 | +noise                                           | 1.88 (0.99, 3.58)           | 1.37 (0.78, 2.39)  | 0.70 (0.41, 1.19)                       | 0.79 (0.41, 1.52)     |
|                 | +PM <sub>10</sub> , NO <sub>2</sub>              | 1.64 (0.84, 3.20)           | 1.19 (0.67, 2.13)  | 0.71 (0.41, 1.22)                       | 0.79 (0.41, 1.53)     |
|                 | +depression                                      | 1.67 (0.89, 3.14)           | 1.26 (0.73, 2.17)  | 0.75 (0.44, 1.28)                       | 0.84 (0.45, 1.59)     |
| WL-L            | Main                                             | 0.76 (0.38, 1.49)           | 0.69 (0.38, 1.24)  | 0.81 (0.46, 1.43)                       | 0.79 (0.41, 1.53)     |
|                 | +noise                                           | 0.76 (0.38, 1.52)           | 0.72 (0.39, 1.34)  | 0.84 (0.47, 1.50)                       | 0.88 (0.44, 1.75)     |
|                 | +PM <sub>10</sub> , NO <sub>2</sub>              | 0.81 (0.40, 1.67)           | 0.67 (0.36, 1.24)  | 0.77 (0.42, 1.38)                       | 0.73 (0.37, 1.45)     |
|                 | +depression                                      | 0.75 (0.38, 1.49)           | 0.68 (0.38, 1.23)  | 0.79 (0.45, 1.40)                       | 0.76 (0.39, 1.48)     |
| WL-R            | Main                                             | 0.72 (0.39, 1.33)           | 0.79 (0.46, 1.35)  | 0.73 (0.44, 1.22)                       | 1.04 (0.56, 1.93)     |
|                 | +noise                                           | 0.76 (0.41, 1.40)           | 0.80 (0.46, 1.38)  | 0.76 (0.45, 1.28)                       | 1.12 (0.59, 2.13)     |
|                 | +PM <sub>10</sub> , NO <sub>2</sub>              | 0.70 (0.36, 1.33)           | 0.74 (0.42, 1.31)  | 0.67 (0.39, 1.15)                       | 0.96 (0.51, 1.84)     |
|                 | +depression                                      | 0.72 (0.39, 1.33)           | 0.79 (0.46, 1.36)  | 0.74 (0.44, 1.23)                       | 1.05 (0.56, 1.97)     |
| Fig-C           | Main                                             | <b>2.72 (1.44, 5.12) **</b> | 1.05 (0.58, 1.93)  | 1.54 (0.85, 2.80)                       | 1.07 (0.53, 2.13)     |
|                 | +noise                                           | <b>2.74 (1.43, 5.24) *</b>  | 1.06 (0.57, 1.97)  | 1.32 (0.71, 2.43)                       | 1.05 (0.52, 2.15)     |
|                 | +PM <sub>10</sub> , NO <sub>2</sub>              | <b>2.54 (1.28, 5.03) **</b> | 0.81 (0.42, 1.55)  | 1.31 (0.71, 2.43)                       | 0.85 (0.41, 1.75)     |
|                 | +depression                                      | <b>2.72 (1.44, 5.12) **</b> | 1.05 (0.57, 1.92)  | 1.54 (0.85, 2.80)                       | 1.06 (0.53, 2.12)     |
| Fig-R           | Main                                             | 1.34 (0.73, 2.45)           | 0.94 (0.53, 1.65)  | 0.91 (0.53, 1.56)                       | 0.56 (0.30, 1.03) (*) |
|                 | +noise                                           | 1.41 (0.76, 2.63)           | 1.03 (0.57, 1.86)  | 0.86 (0.50, 1.49)                       | 0.54 (0.28, 1.03) (*) |

| Cognitive Score | Model                               | Residential Noise            |                              | Noise Annoyance              |                              |
|-----------------|-------------------------------------|------------------------------|------------------------------|------------------------------|------------------------------|
|                 |                                     | L <sub>DEN</sub>             | L <sub>NIGHT</sub>           | Day                          | Night                        |
|                 | +PM <sub>10</sub> , NO <sub>2</sub> | 1.53 (0.79, 2.94)            | 0.97 (0.53, 1.79)            | 0.91 (0.52, 1.59)            | <i>0.53 (0.28, 1.01) (*)</i> |
|                 | +depression                         | 1.34 (0.73, 2.46)            | 0.93 (0.53, 1.64)            | 0.89 (0.52, 1.53)            | <b>0.53 (0.28, 1.00) *</b>   |
| TMT-A           | Main                                | 1.14 (0.65, 2.01)            | 1.00 (0.60, 1.68)            | 0.75 (0.46, 1.23)            | 0.86 (0.48, 1.55)            |
|                 | +noise                              | 1.23 (0.69, 2.20)            | 1.06 (0.62, 1.81)            | 0.72 (0.44, 1.20)            | 0.85 (0.46, 1.56)            |
|                 | +PM <sub>10</sub> , NO <sub>2</sub> | 1.17 (0.64, 2.15)            | 0.96 (0.55, 1.67)            | 0.68 (0.41, 1.14)            | 0.79 (0.43, 1.45)            |
|                 | +depression                         | 1.15 (0.65, 2.03)            | 0.98 (0.58, 1.66)            | 0.70 (0.43, 1.16)            | 0.78 (0.42, 1.42)            |
| TMT-B           | Main                                | 1.13 (0.64, 2.01)            | 0.85 (0.51, 1.43)            | 0.88 (0.54, 1.44)            | 0.85 (0.47, 1.54)            |
|                 | +noise                              | 1.14 (0.64, 2.05)            | 0.83 (0.48, 1.41)            | 0.86 (0.52, 1.42)            | 0.88 (0.47, 1.63)            |
|                 | +PM <sub>10</sub> , NO <sub>2</sub> | 1.22 (0.66, 2.25)            | 0.86 (0.49, 1.49)            | 0.87 (0.52, 1.46)            | 0.84 (0.45, 1.56)            |
|                 | +depression                         | 1.12 (0.63, 1.98)            | 0.84 (0.50, 1.41)            | 0.84 (0.51, 1.38)            | 0.79 (0.43, 1.45)            |
| TMT-B/A         | Main                                | 1.05 (0.55, 2.00)            | 0.61 (0.34, 1.12)            | 1.03 (0.60, 1.79)            | 0.91 (0.47, 1.80)            |
|                 | +noise                              | 1.07 (0.55, 2.07)            | <i>0.59 (0.32, 1.10) (*)</i> | 1.03 (0.59, 1.79)            | 1.08 (0.53, 2.18)            |
|                 | +PM <sub>10</sub> , NO <sub>2</sub> | 1.00 (0.50, 1.99)            | <i>0.56 (0.29, 1.07) (*)</i> | 1.06 (0.60, 1.87)            | 0.93 (0.46, 1.88)            |
|                 | +depression                         | 1.04 (0.55, 1.99)            | 0.61 (0.33, 1.11)            | 1.02 (0.59, 1.77)            | 0.89 (0.45, 1.76)            |
| MMS             | Main                                | 0.97 (0.52, 1.81)            | 1.33 (0.75, 2.36)            | 0.76 (0.44, 1.29)            | 1.10 (0.58, 2.10)            |
|                 | +noise                              | 0.98 (0.52, 1.85)            | 1.38 (0.76, 2.49)            | 0.75 (0.44, 1.30)            | 1.01 (0.52, 1.98)            |
|                 | +PM <sub>10</sub> , NO <sub>2</sub> | 0.85 (0.44, 1.65)            | 1.26 (0.68, 2.34)            | 0.72 (0.42, 1.26)            | 1.08 (0.55, 2.10)            |
|                 | +depression                         | 0.97 (0.52, 1.81)            | 1.33 (0.75, 2.36)            | 0.75 (0.44, 1.28)            | 1.08 (0.57, 2.07)            |
| Total score     | Main                                | <i>1.69 (0.94, 3.04) (*)</i> | 0.87 (0.51, 1.49)            | 0.68 (0.41, 1.14)            | 0.64 (0.35, 1.17)            |
|                 | +noise                              | <b>1.84 (1.01, 3.38) *</b>   | 0.95 (0.54, 1.65)            | <i>0.62 (0.36, 1.04) (*)</i> | 0.65 (0.35, 1.21)            |
|                 | +PM <sub>10</sub> , NO <sub>2</sub> | <i>1.87 (0.99, 3.52) (*)</i> | 0.83 (0.47, 1.48)            | <i>0.63 (0.37, 1.07) (*)</i> | <i>0.58 (0.31, 1.09) (*)</i> |
|                 | +depression                         | <i>1.68 (0.93, 3.04) (*)</i> | 0.87 (0.51, 1.49)            | 0.67 (0.40, 1.13)            | 0.63 (0.34, 1.16)            |

<sup>1</sup> We modeled the probability that score < 0 (cognitive performance lower than expected for the participant's age and educational level).

<sup>2</sup> Adjusted for age (linear, squared, and cubic terms), smoking, passive smoking, and educational level.

<sup>3</sup> The models with L<sub>DEN</sub> and L<sub>NIGHT</sub> as main exposure were adjusted for annoyance (day or night, respectively). The models with annoyance as main exposure were adjusted for L<sub>DEN</sub> or L<sub>NIGHT</sub>, correspondingly.

<sup>4</sup> Main model additionally adjusted for PM<sub>10</sub> and NO<sub>2</sub>.

<sup>5</sup> Main model additionally adjusted for physician-diagnosed depression.

<sup>6</sup> Statistical significance: (\*)  $p < 0.1$ , \*  $p < 0.05$ , \*\*  $p < 0.01$ .

Statistical significance ( $p < 0.05$ ) is indicated by boldface while borderline significance ( $0.05 < p < 0.1$ ) is indicated by italics.

**Table S3.** Adjusted <sup>1</sup> association of L<sub>NIGHT</sub> ≥ 40 dB(A) with dichotomized cognitive scores <sup>2</sup>.

| Cognitive Score | Odds Ratio (95% CI)      | <i>p</i> -Value |
|-----------------|--------------------------|-----------------|
| SeFl            | 1.04 (0.54, 2.03)        | 0.8971          |
| BNT             | 1.51 (0.64, 3.54)        | 0.3453          |
| PhFl            | 1.38 (0.66, 2.89)        | 0.3890          |
| WL-L            | 0.89 (0.39, 2.05)        | 0.7895          |
| WL-R            | 1.05 (0.51, 2.18)        | 0.8966          |
| Fig-C           | <b>2.27 (1.09, 4.72)</b> | <b>0.0285</b>   |
| Fig-R           | 0.98 (0.46, 2.09)        | 0.9630          |
| TMT-A           | 1.10 (0.55, 2.20)        | 0.7824          |
| TMT-B           | 0.64 (0.32, 1.26)        | 0.1937          |
| TMT-B/A         | 0.98 (0.44, 2.16)        | 0.9555          |
| MMS             | 0.91 (0.42, 1.95)        | 0.8021          |
| Total score     | 1.74 (0.85, 3.55)        | 0.1289          |

<sup>1</sup> Adjusted for age (linear, squared, and cubic terms), smoking, passive smoking, and educational level. <sup>2</sup> We modeled the probability that score < 0 (cognitive performance lower than expected for the participant's age and educational level). Statistical significance ( $p < 0.05$ ) is indicated by boldface while borderline significance ( $0.05 < p < 0.1$ ) is indicated by italics.

**Table S4.** Adjusted <sup>1</sup> association of noise annoyance with dichotomized cognitive scores <sup>2</sup> in the extended dataset ( $N = 747$ ).

| Cognitive Score | Annoyance at Day         |                 | Annoyance at Night       |                 |
|-----------------|--------------------------|-----------------|--------------------------|-----------------|
|                 | Odds Ratio (95% CI)      | <i>p</i> -Value | Odds Ratio (95% CI)      | <i>p</i> -Value |
| SeFl            | 1.18 (0.87, 1.6)         | 0.2833          | <i>1.42 (0.96, 2.1)</i>  | <i>0.0772</i>   |
| BNT             | <b>0.67 (0.48, 0.95)</b> | <b>0.0247</b>   | 0.69 (0.44, 1.08)        | 0.1046          |
| PhFl            | 0.86 (0.62, 1.19)        | 0.3641          | 0.86 (0.57, 1.32)        | 0.5003          |
| WL-L            | 0.79 (0.55, 1.12)        | 0.1853          | 0.84 (0.54, 1.3)         | 0.4266          |
| WL-R            | <b>0.69 (0.5, 0.95)</b>  | <b>0.0238</b>   | 0.91 (0.6, 1.36)         | 0.6304          |
| Fig-C           | 1.16 (0.78, 1.72)        | 0.4608          | 0.99 (0.6, 1.64)         | 0.9838          |
| Fig-R           | 0.84 (0.59, 1.21)        | 0.3478          | 0.70 (0.45, 1.08)        | 0.1071          |
| TMT-A           | 0.91 (0.66, 1.24)        | 0.5490          | 0.84 (0.56, 1.24)        | 0.3744          |
| TMT-B           | 0.83 (0.61, 1.14)        | 0.2465          | 0.82 (0.55, 1.23)        | 0.3417          |
| TMT-B/A         | 0.93 (0.66, 1.3)         | 0.6597          | 0.77 (0.49, 1.2)         | 0.2488          |
| MMS             | 1.09 (0.77, 1.54)        | 0.6379          | 1.13 (0.72, 1.76)        | 0.5974          |
| Total score     | <i>0.75 (0.54, 1.04)</i> | <i>0.0817</i>   | <i>0.79 (0.53, 1.18)</i> | <i>0.2490</i>   |

<sup>1</sup> Adjusted for age (linear, squared, and cubic terms), smoking, passive smoking, and educational level. <sup>2</sup> We modeled the probability that score < 0 (cognitive performance lower than expected for the participant's age and educational level). Statistical significance ( $p < 0.05$ ) is indicated by boldface while borderline significance ( $0.05 < p < 0.1$ ) is indicated by italics.

**Table S5.** Adjusted <sup>1</sup> association of annoyance (cutpoint "moderately") with dichotomized cognitive scores <sup>2</sup>.

| Cognitive Score | Annoyance at Day    |                 | Annoyance at Night  |                 |
|-----------------|---------------------|-----------------|---------------------|-----------------|
|                 | Odds Ratio (95% CI) | <i>p</i> -Value | Odds Ratio (95% CI) | <i>p</i> -Value |

|             |                   |        |                   |        |
|-------------|-------------------|--------|-------------------|--------|
| SeFI        | 0.93 (0.53, 1.61) | 0.7915 | 1.09 (0.52, 2.29) | 0.8151 |
| BNT         | 0.96 (0.50, 1.83) | 0.8935 | 0.97 (0.40, 2.33) | 0.9445 |
| PhFI        | 0.67 (0.36, 1.24) | 0.2003 | 0.81 (0.35, 1.84) | 0.6119 |
| WL-L        | 1.23 (0.63, 2.41) | 0.5390 | 0.68 (0.29, 1.55) | 0.3557 |
| WL-R        | 0.79 (0.44, 1.42) | 0.4347 | 0.98 (0.44, 2.18) | 0.9648 |
| Fig-C       | 1.21 (0.61, 2.38) | 0.5861 | 1.45 (0.56, 3.72) | 0.4451 |
| Fig-R       | 1.02 (0.54, 1.90) | 0.9547 | 1.07 (0.46, 2.46) | 0.8818 |
| TMT-A       | 0.79 (0.45, 1.39) | 0.4178 | 0.77 (0.36, 1.63) | 0.4963 |
| TMT-B       | 0.92 (0.52, 1.62) | 0.7765 | 1.52 (0.72, 3.21) | 0.2736 |
| TMT-B/A     | 0.93 (0.49, 1.76) | 0.8154 | 1.17 (0.50, 2.70) | 0.7186 |
| MMS         | 0.75 (0.41, 1.37) | 0.3457 | 1.28 (0.55, 2.99) | 0.5708 |
| Total score | 0.95 (0.53, 1.69) | 0.8487 | 0.94 (0.43, 2.05) | 0.8813 |

<sup>1</sup> Adjusted for age (linear, squared, and cubic terms), smoking, passive smoking, and educational level. <sup>2</sup> We modeled the probability that score < 0 (cognitive performance lower than expected for the participant's age and educational level).

**Table S6.** Effect modification analysis, using combined residential noise exposure and annoyance at night in the main adjusted model <sup>1</sup>. Odds ratios and 95% confidence intervals are presented.

| Cognitive Score <sup>2</sup> | L <sub>NIGHT</sub> < 50 dB(A), No Annoyance at Night | L <sub>NIGHT</sub> ≥ 50 dB(A), No Annoyance at Night | L <sub>NIGHT</sub> < 50 dB(A), Annoyance at Night | L <sub>NIGHT</sub> ≥ 50 dB(A), Annoyance at Night |
|------------------------------|------------------------------------------------------|------------------------------------------------------|---------------------------------------------------|---------------------------------------------------|
| SeFI                         | 1.00 (reference)                                     | 0.94 (0.51, 1.73)                                    | 1.16 (0.50, 2.70)                                 | 0.93 (0.44, 1.94)                                 |
| BNT                          | 1.00 (reference)                                     | 1.65 (0.84, 3.25)                                    | 0.59 (0.19, 1.89)                                 | 0.96 (0.39, 2.35)                                 |
| PhFI                         | 1.00 (reference)                                     | 1.64 (0.87, 3.09)                                    | 1.23 (0.50, 3.03)                                 | 0.85 (0.36, 1.98)                                 |
| WL-L                         | 1.00 (reference)                                     | 0.69 (0.34, 1.41)                                    | 0.84 (0.31, 2.31)                                 | 0.63 (0.27, 1.46)                                 |
| WL-R                         | 1.00 (reference)                                     | 0.68 (0.36, 1.29)                                    | 0.87 (0.35, 2.16)                                 | 0.97 (0.43, 2.16)                                 |
| Fig-C                        | 1.00 (reference)                                     | 1.16 (0.56, 2.41)                                    | 1.32 (0.45, 3.87)                                 | 1.00 (0.42, 2.37)                                 |
| Fig-R                        | 1.00 (reference)                                     | 1.33 (0.63, 2.78)                                    | 0.73 (0.29, 1.84)                                 | 0.52 (0.24, 1.14)                                 |
| TMT-A                        | 1.00 (reference)                                     | 1.29 (0.69, 2.43)                                    | 1.30 (0.53, 3.18)                                 | 0.74 (0.35, 1.57)                                 |
| TMT-B                        | 1.00 (reference)                                     | 1.11 (0.60, 2.04)                                    | 1.40 (0.59, 3.3)                                  | 0.60 (0.27, 1.36)                                 |
| TMT-B/A                      | 1.00 (reference)                                     | 0.61 (0.30, 1.26)                                    | 1.12 (0.42, 2.94)                                 | 0.63 (0.26, 1.53)                                 |
| MMS                          | 1.00 (reference)                                     | 1.00 (0.51, 1.98)                                    | 0.62 (0.26, 1.51)                                 | 1.80 (0.72, 4.47)                                 |
| Total score                  | 1.00 (reference)                                     | 0.70 (0.36, 1.35)                                    | <b>0.37 (0.15, 0.89) <sup>*,3</sup></b>           | 0.81 (0.37, 1.77)                                 |

<sup>1</sup> Adjusted for age (linear, squared, and cubic terms), smoking, passive smoking, and educational level. <sup>2</sup> We modeled the probability that score < 0 (cognitive performance lower than expected for the participant's age and educational level). <sup>3</sup> Statistical significance: (\*)  $p < 0.1$ , \*  $p < 0.05$ , \*\*  $p < 0.01$ . Statistical significance ( $p < 0.05$ ) is indicated by boldface while borderline significance ( $0.05 < p < 0.1$ ) is indicated by italics.

**Table S7.** Associations of residential noise with annoyance <sup>1</sup>.

| Outcome                         | Crude Model              |                   | Main Model <sup>2</sup>  |                 |
|---------------------------------|--------------------------|-------------------|--------------------------|-----------------|
|                                 | OR (95% CI)              | <i>p</i> -Value   | OR (95% CI)              | <i>p</i> -Value |
| Annoyance at day <sup>3</sup>   | <b>2.21 (1.26, 3.9)</b>  | <b>0.006</b>      | <b>2.38 (1.33, 4.26)</b> | <b>0.0033</b>   |
| Annoyance at night <sup>4</sup> | <b>3.29 (1.87, 5.78)</b> | <b>&lt;0.0001</b> | <b>3.21 (1.79, 5.76)</b> | <b>0.0001</b>   |

<sup>1</sup>Dichotomized at “somewhat”. <sup>2</sup>Adjusted for age (linear, squared, and cubic terms), smoking, passive smoking, and educational level. <sup>3</sup>Associations with  $L_{DEN}$ . <sup>4</sup>Associations with  $L_{NIGHT}$ . Statistical significance ( $p < 0.05$ ) is indicated by boldface while borderline significance ( $0.05 < p < 0.1$ ) is indicated by italics.

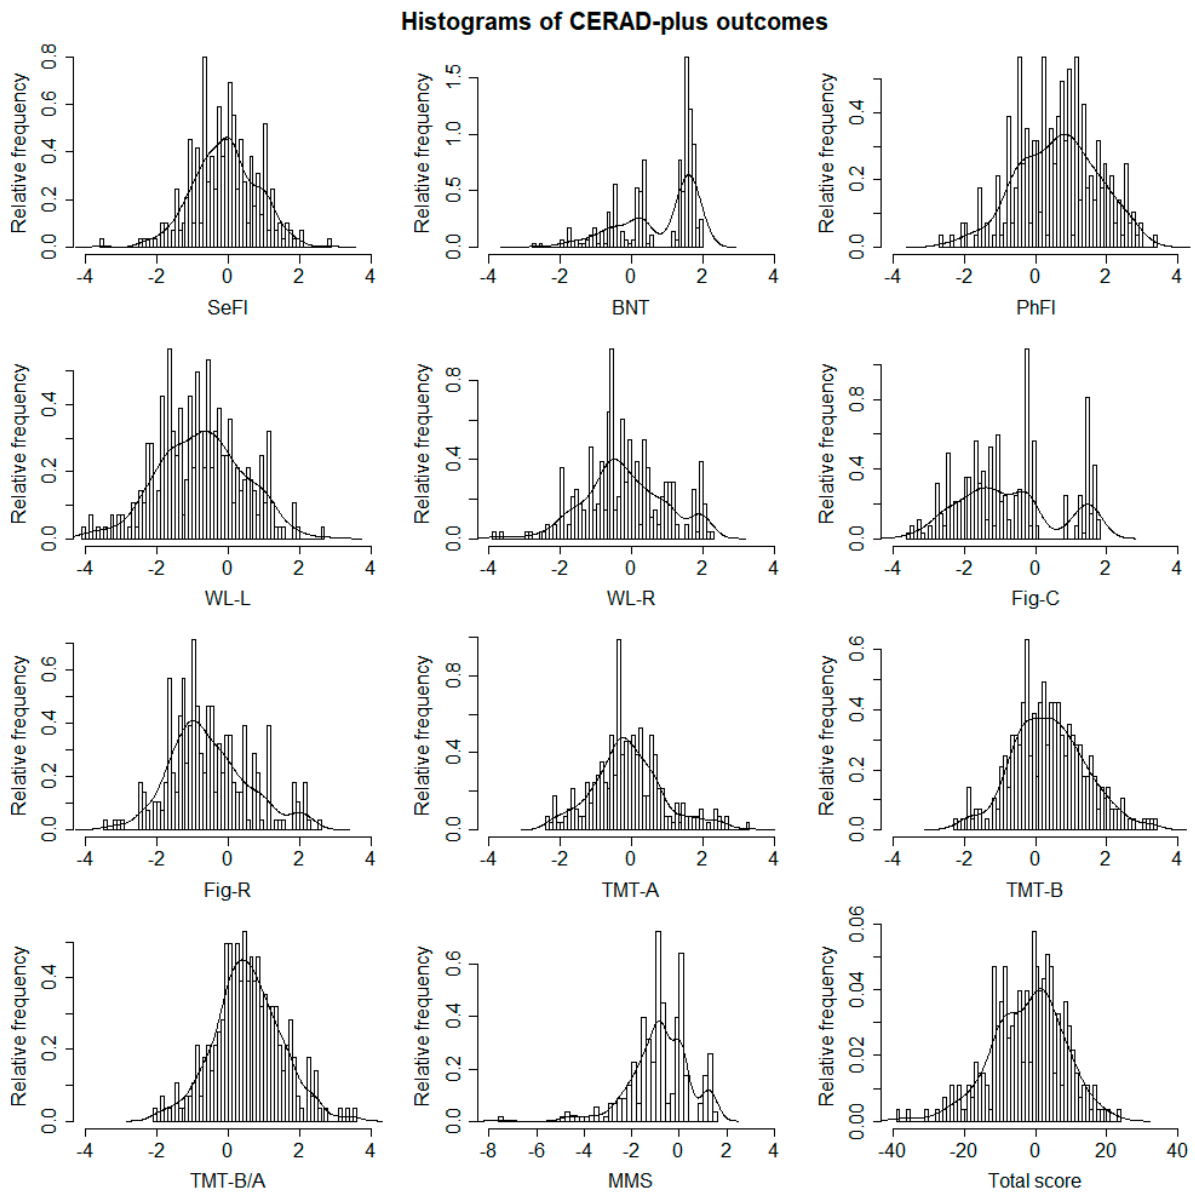

**Figure S1.** Distributions of CERAD-Plus z-scores in main sample ( $N = 288$ ).
